# Supplementary material for: Two-dimensional penta-SiAs2: a potential metal-free photocatalyst for overall water splitting
Source: Royal Society of Chemistry journal article supplement (doi:10.1039/d0tc01206h), 2020-01-01
Supplement: d0tc01206h1.pdf [file d0tc01206h1.pdf]

## Supporting Information

### **Two-dimensional SiAs<sub>2</sub>: metal-free photocatalysts for overall water splitting with ultrahigh carrier mobility and pronounced light absorption**

Kai Zheng,<sup>a,#</sup> Heping Cui,<sup>a,#</sup> Houcai Luo,<sup>a</sup> Jiabing Yu,<sup>a</sup> Shaogang Wang,<sup>a</sup> Chunjian Tan,<sup>a</sup> Liming Wang,<sup>a</sup> Xiandong Li,<sup>a</sup> Luqi Tao,<sup>a</sup> and Xianping Chen,<sup>\*a</sup>

<sup>a)</sup> *Key Laboratory of Optoelectronic Technology & Systems, Education Ministry of China, Chongqing University and College of Optoelectronic Engineering, State Key Laboratory of Power Transmission Equipment & System Security and New Technology, Chongqing University, 400044 Chongqing, China.*

<sup>#</sup> *These authors contributed equally to this work.*

<sup>\*</sup> *To whom correspondence should be addressed: [xianpingchen@cqu.edu.cn](mailto:xianpingchen@cqu.edu.cn)*

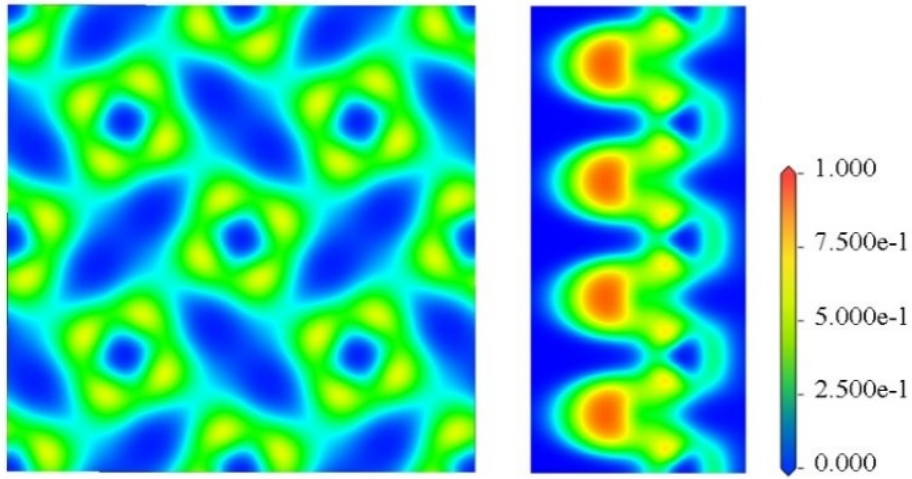

**Figure S1.** Electron localization functional of penta-SiAs<sub>2</sub> monolayer.

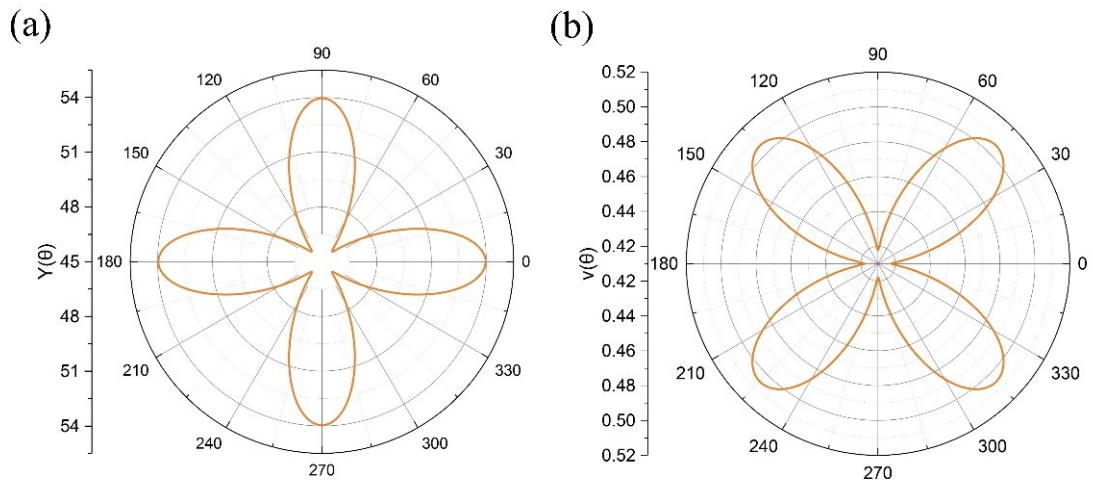

**Figure S2.** The orientation dependent Young's moduli and Poisson's ratio of penta-SiAs<sub>2</sub>.

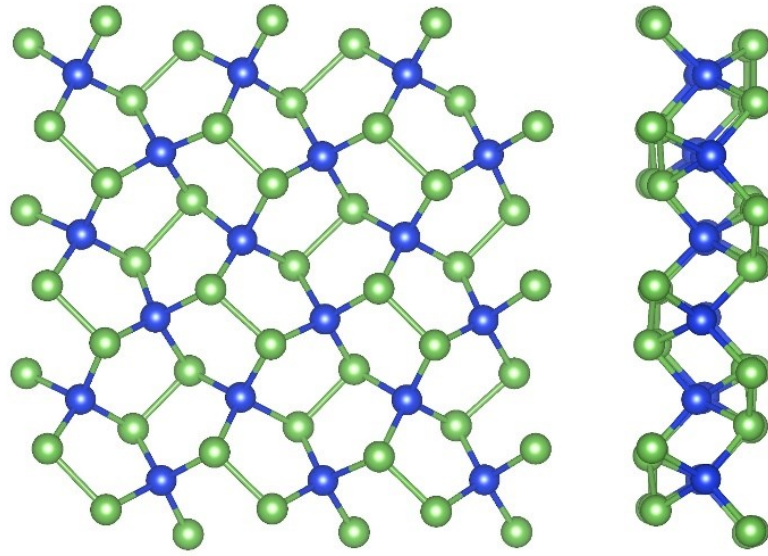

**Figure S3.** Snapshots of AIMD simulations of penta-SiAs<sub>2</sub> monolayer at the end of 2 ps with the temperature controlled at 300 K from top view and side view.

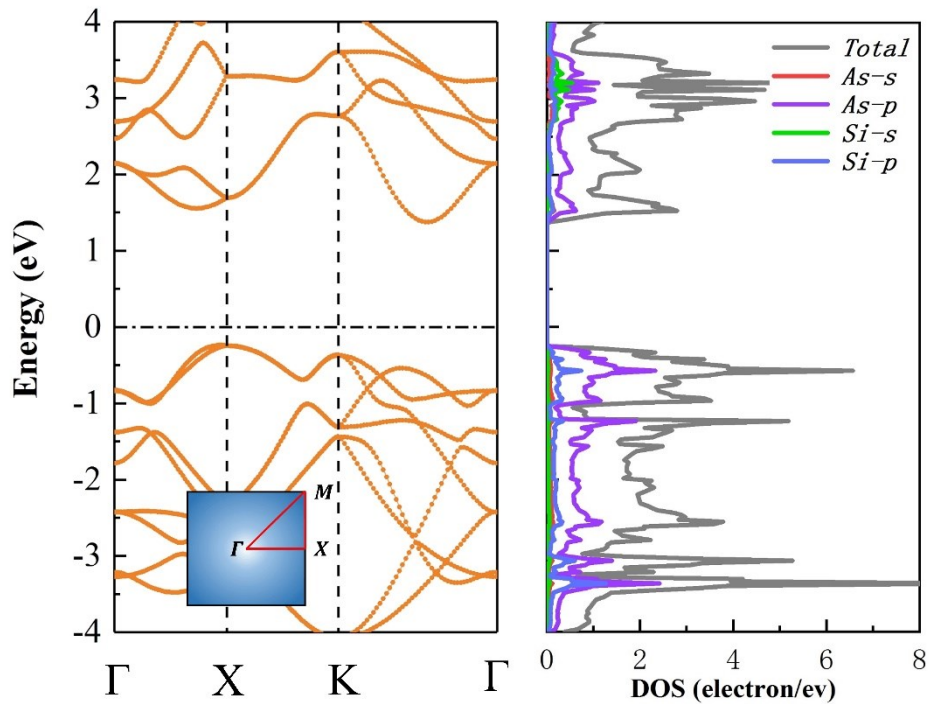

**Figure S4.** Band structure of monolayer penta-SiAs<sub>2</sub> with the GGA-PBE functional.

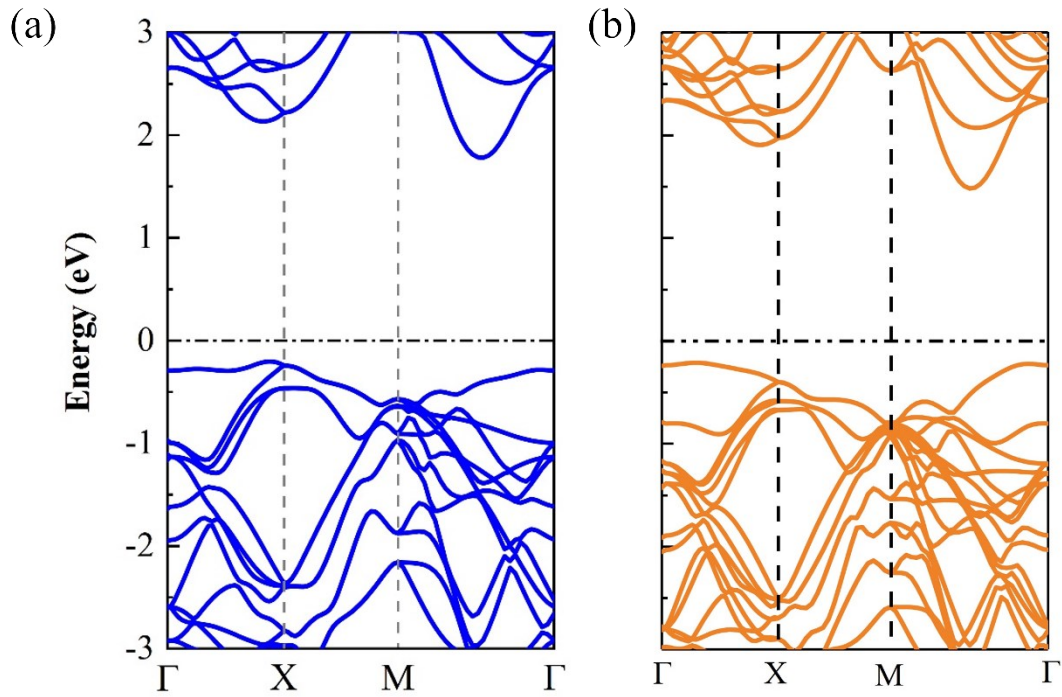

**Figure S5.** Band structure of (a) bilayer and (b) trilayer penta-SiAs<sub>2</sub> with the HSE06 functional.

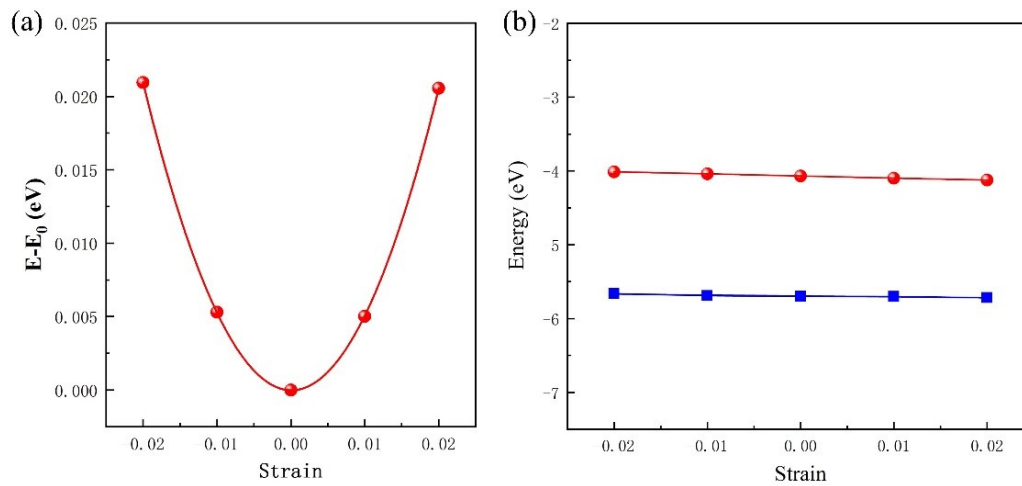

**Figure S6.** Strain energy curves for penta-SiAs<sub>2</sub> monolayer. Linear fittings of the CBM and VBM shift with respect to the lattice dilation or compression in transport directions.

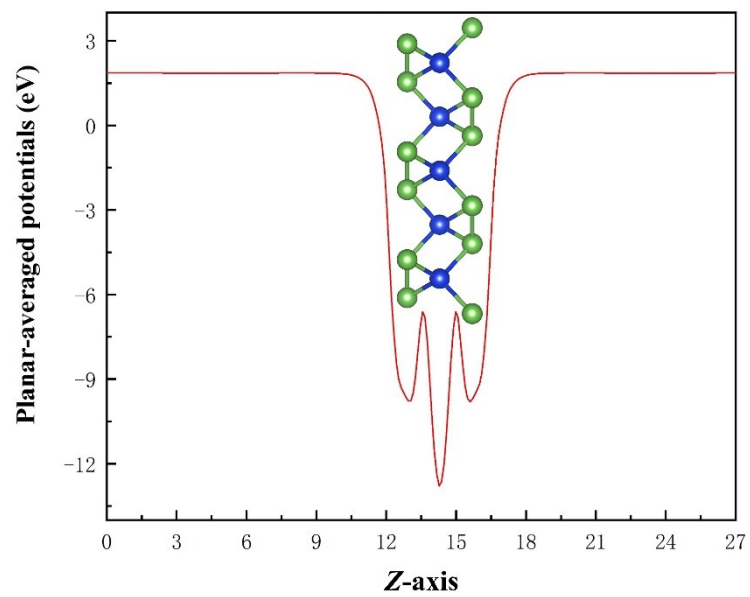

**Figure S7.** Planar-averaged potential along the Z-axis direction for penta-SiAs<sub>2</sub> monolayer.

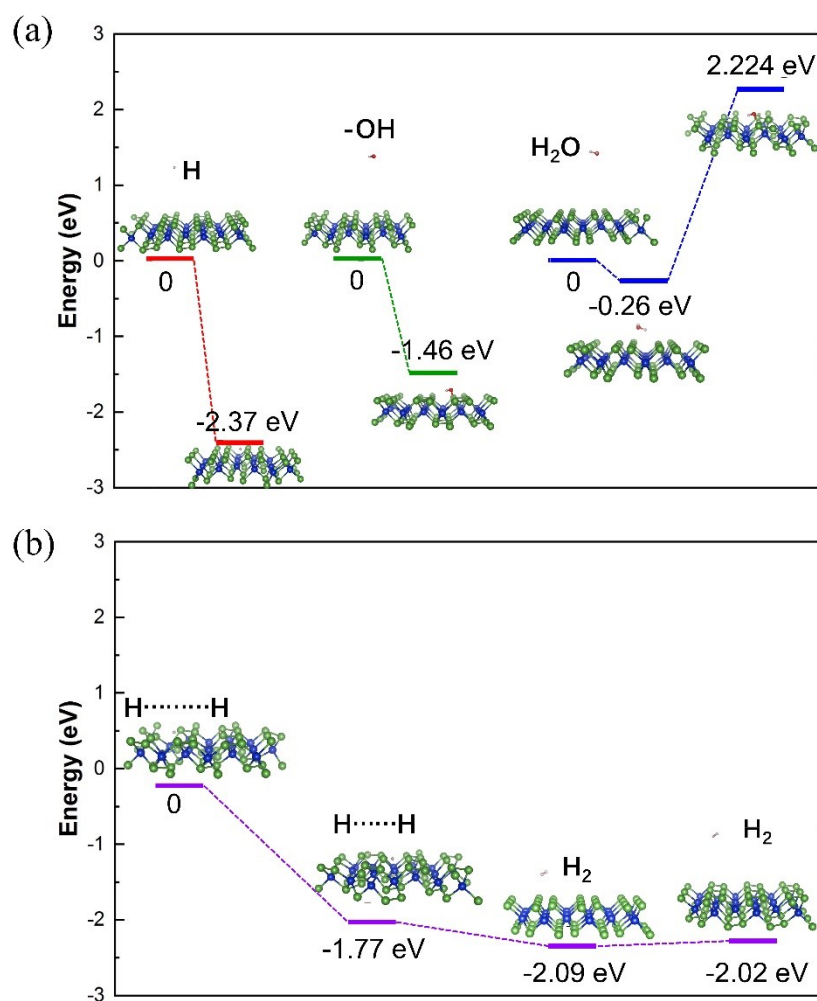

**Fig. S8** (a) Energy differences between the configurations of before and after adsorption H, OH, and H<sub>2</sub>O, and decomposition of H<sub>2</sub>O on monolayer SiAs<sub>2</sub>. (b) Energy pathways of releasing of hydrogen on 2D SiAs<sub>2</sub>. The red and white spheres represent the O and H atoms, respectively.
